# Supplementary material for: Simultaneous improvement in electrical conductivity and Seebeck coefficient of PEDOT:PSS by N2pressure-induced nitric acid treatment
Source: Royal Society of Chemistry journal article supplement (doi:10.1039/c8ra06094k), 2018-01-01
Supplement: c8ra06094k1.pdf [file c8ra06094k1.pdf]

## SUPPLEMENTARY INFORMATION

### Simultaneous improvement in electrical conductivity and Seebeck coefficient of PEDOT: PSS by N<sub>2</sub> pressure-induced nitric acid treatment

May Thu Zar Myint<sup>a</sup>, Masaki Hada<sup>a</sup>, Hirotaka Inoue<sup>a</sup>, Tatsuki Marui<sup>a</sup>, Takeshi Nishikawa<sup>a</sup>, Yuta Nishina<sup>a</sup>, Susumu Ichimuya<sup>b</sup>, Masayoshi Umeno<sup>c</sup>, Aung Ko Ko Kyaw<sup>d,e\*</sup> and Yasuhiko Hayashi<sup>a\*</sup>

<sup>a</sup> Graduate School of Natural Science and Technology, Okayama University, Okayama, 700-8530, Japan,  
Email: hayashi.yasuhiko@okayama-u.ac.jp

<sup>b</sup> Nagoya Industries Promotion Corporation, 3-4-41 Rokuban, Atsuta, Nagoya, 456-0058, Japan.

<sup>c</sup> C's Techno Inc., Anagahora, Shimoshidami, Moriyama, Nagoya, Aichi 463-0003, Japan.

<sup>d</sup> Department of Electrical and Electronic Engineering, Southern University of Science and Technology, Shenzhen 518055, P.R. China. Email: aung@sustc.edu.cn

<sup>e</sup> Shenzhen Planck Innovation Technologies Pte Ltd, Ganli, 6<sup>th</sup> Road, Longgang, Shenzhen, 518112 China.

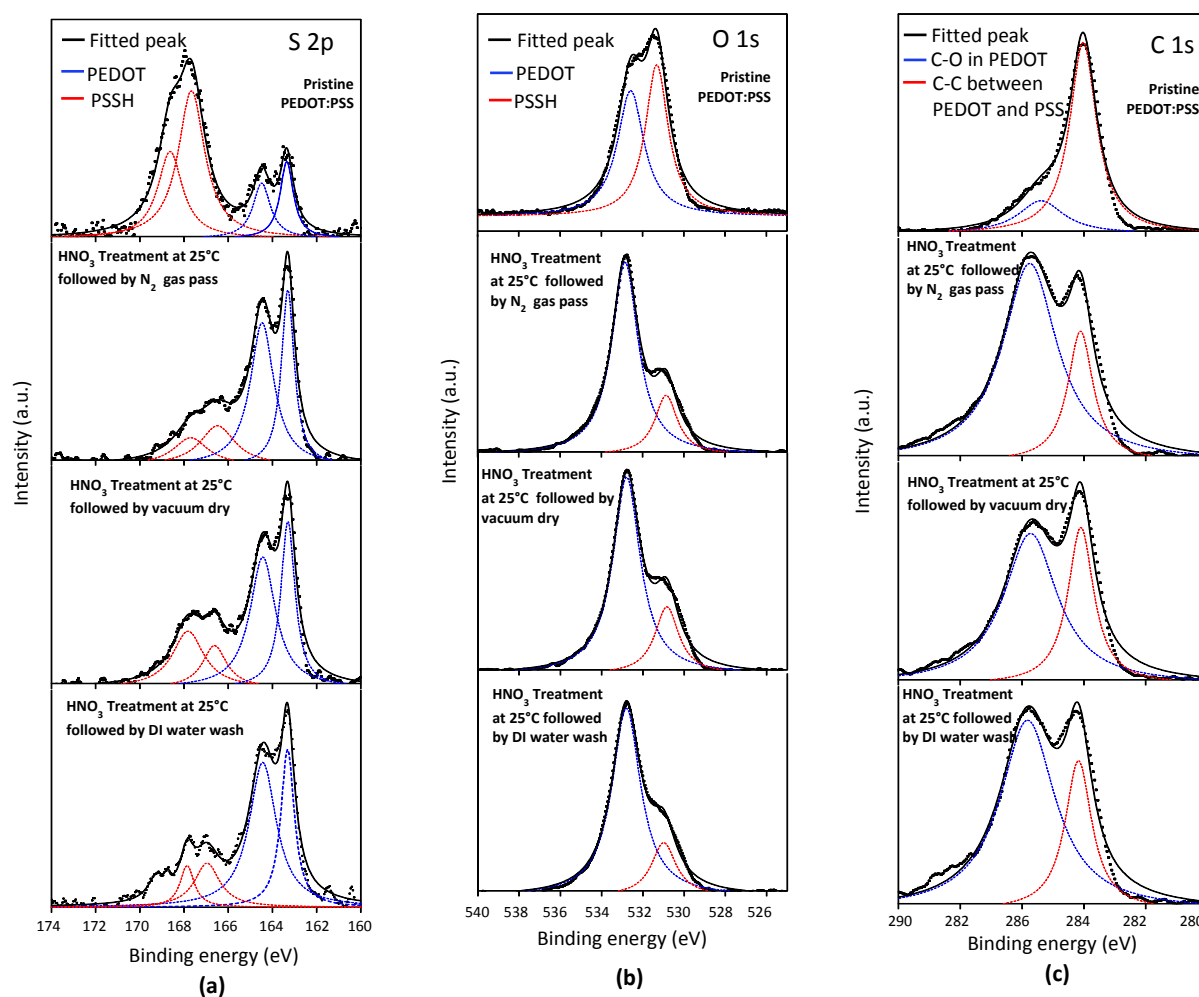

**Figure S-1:** (a) S 2p, (b) O 1s and (c) C 1s core-level spectra of the pristine PEDOT:PSS and HNO<sub>3</sub> treated PEDOT:PSS at different conditions. The dotted curves represent the experimental results and the blue and red curves correspond to the deconvoluted peaks for the PEDOT and PSSH.

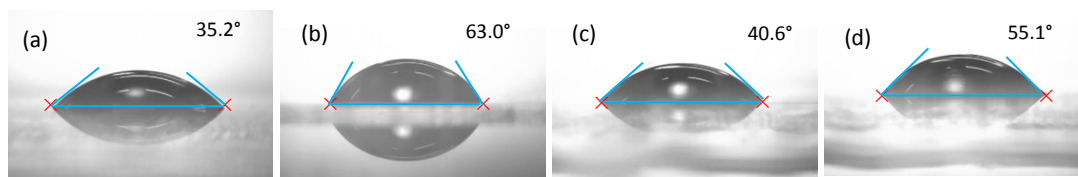

**Figure S-2:** Contact angle measurement of samples: (a) pristine PEDOT:PSS and treatment with  $\text{HNO}_3$  followed by (b)  $\text{N}_2$  gas passing, (c) vacuum dry, and (d) DI water wash. (Measurements were performed within 5s.)

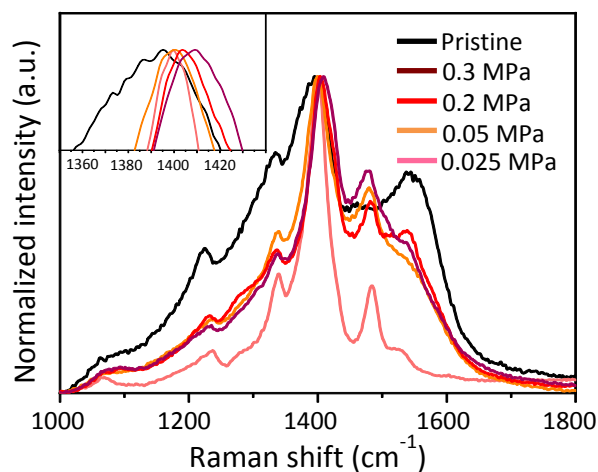

**Figure S-3:** Raman spectra of pristine PEDOT:PSS and that of the treated samples at pressures of 0.025 MPa, 0.05 MPa, 0.2 MPa and 0.3 MPa, respectively. The inset curve shows the peak shift from  $1396\text{ cm}^{-1}$  to  $1399\text{ cm}^{-1}$ ,  $1400\text{ cm}^{-1}$ ,  $1404\text{ cm}^{-1}$  and  $1409\text{ cm}^{-1}$  after the samples have treated with  $\text{N}_2$  gas at pressures of 0.025 MPa, 0.05 MPa, 0.2 MPa and 0.3 MPa, respectively.

**Table 1-**Composition of the pristine PEDOT:PSS films and  $\text{HNO}_3$  treated PEDOT:PSS films at different treatment conditions obtained by XPS analysis

| photoelectron peaks | atom %             |                                                                    |                                                      |                                                         |
|---------------------|--------------------|--------------------------------------------------------------------|------------------------------------------------------|---------------------------------------------------------|
|                     | pristine PEDOT:PSS | Treatment with $\text{HNO}_3$ followed by $\text{N}_2$ gas passing | Treatment with $\text{HNO}_3$ followed by vacuum dry | Treatment with $\text{HNO}_3$ followed by DI water wash |
| S $2p_{3/2}$        | 5.88               | 6.25                                                               | 6.27                                                 | 6.33                                                    |
| S $2p_{1/2}$        | 16.13              | 18.33                                                              | 17.88                                                | 19.08                                                   |
| O $1s$              | 24.54              | 24.15                                                              | 24.25                                                | 23.63                                                   |
| C $1s$              | 51.01              | 51.26                                                              | 51.31                                                | 50.18                                                   |

**Table 2**-Interplanar spacing and grain size of the PEDOT:PSS films at various  $2\theta$  values before and after treatment .

| Treatment condition                                                        |                            | $2\theta$ (degree) | d-spacing (nm) | grain size (nm) |
|----------------------------------------------------------------------------|----------------------------|--------------------|----------------|-----------------|
| pristine                                                                   | (100)                      | –                  | –              | –               |
| Treatment with $\text{HNO}_3$ at 25°C followed by $\text{N}_2$ gas passing |                            | 6.9°               | 1.28           | 5.04            |
| Treatment with $\text{HNO}_3$ at 25°C followed by vacuum dry               |                            | 6.9°               | 1.28           | 4.7             |
| Treatment with $\text{HNO}_3$ at 25°C followed by DI water wash            |                            | 6.6°               | 1.34           | 3.6             |
| Treatment with $\text{HNO}_3$ at 130°C followed by DI water wash           |                            | –                  | –              | –               |
| pristine                                                                   | (200)                      | –                  | –              | –               |
| Treatment with $\text{HNO}_3$ at 25°C followed by $\text{N}_2$ gas passing |                            | 13.2°              | 0.67           | 5.07            |
| Treatment with $\text{HNO}_3$ at 25°C followed by vacuum dry               |                            | 13°                | 0.68           | 4.71            |
| Treatment with $\text{HNO}_3$ at 25°C followed by DI water wash            |                            | 12°                | 0.74           | 3.62            |
| Treatment with $\text{HNO}_3$ at 130°C followed by DI water wash           |                            | –                  | –              | –               |
| pristine                                                                   | amorphous halo diffraction | 17.5°              | 0.51           | 0.87            |
| Treatment with $\text{HNO}_3$ at 25°C followed by $\text{N}_2$ gas passing |                            | –                  | –              | –               |
| Treatment with $\text{HNO}_3$ at 25°C followed by vacuum dry               |                            | 18.3°              | 0.48           | 4.74            |
| Treatment with $\text{HNO}_3$ at 25°C followed by DI water wash            |                            | 18.7°              | 0.47           | 3.65            |
| Treatment with $\text{HNO}_3$ at 130°C followed by DI water wash           |                            | –                  | –              | –               |
| pristine                                                                   | (010)                      | 25.6°              | 0.35           | 0.91            |
| Treatment with $\text{HNO}_3$ at 25°C followed by $\text{N}_2$ gas passing |                            | –                  | –              | –               |
| Treatment with $\text{HNO}_3$ at 25°C followed by vacuum dry               |                            | 25.9°              | 0.34           | 4.8             |
| Treatment with $\text{HNO}_3$ at 25°C followed by DI water wash            |                            | –                  | –              | –               |
| Treatment with $\text{HNO}_3$ at 130°C followed by DI water wash           |                            | –                  | –              | –               |

**Table 3**-Contact angles of the PEDOT:PSS films before and after  $\text{HNO}_3$  treatment at various conditions.

| Time | Contact angle (°) |                                                                            |                                                              |                                                                 |
|------|-------------------|----------------------------------------------------------------------------|--------------------------------------------------------------|-----------------------------------------------------------------|
|      | Pristine          | Treatment with $\text{HNO}_3$ at 25°C followed by $\text{N}_2$ gas passing | Treatment with $\text{HNO}_3$ at 25°C followed by vacuum dry | Treatment with $\text{HNO}_3$ at 25°C followed by DI water wash |
| 5 s  | 35.2              | 63                                                                         | 40.6                                                         | 55.1                                                            |
| 15 s | 33.5              | 63.4                                                                       | 40.4                                                         | 54.7                                                            |
| 25 s | 22.0              | 62.3                                                                       | 39.4                                                         | 53.4                                                            |
| 65 s | 18.5              | 60.5                                                                       | 38.4                                                         | 51.9                                                            |
